# Supplementary material for: Targeted Protein Degradation by Chimeric Compounds using Hydrophobic E3 Ligands and Adamantane Moiety
Source: PubMed Central journal article supplement (PMC7151680; doi:10.3390/ph13030034), 2020-02-25
Supplement: pharmaceuticals-13-00034-s001.pdf [file pharmaceuticals-13-00034-s001.pdf]

## Supplementary Material

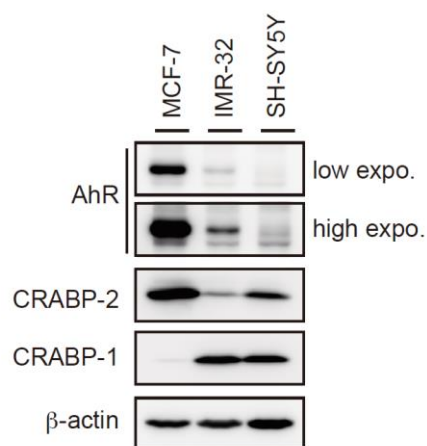

Figure S1  
Levels of CRABP-1, CRABP-2, and AhR in the indicated cancer cells.

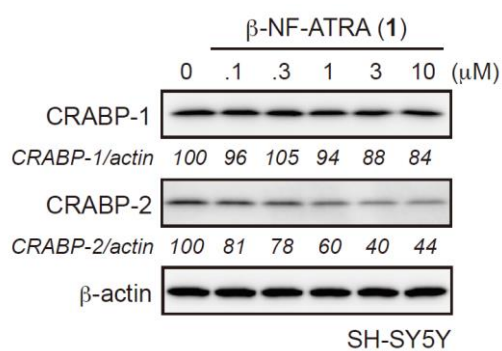

Figure S2  
Protein knockdown activity of β-NF-ATRA. SH-SY5Y cells were treated with β-NF-ATRA for 24 h. Whole-cell lysates were analyzed by western blotting.

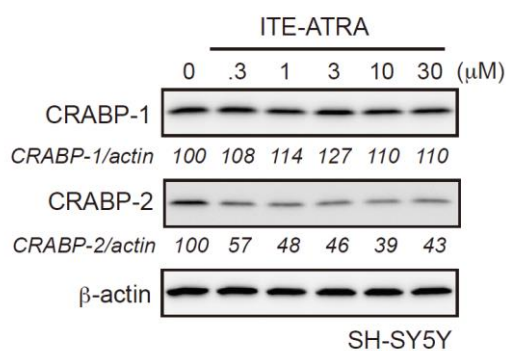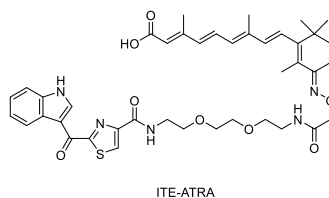

Figure S3  
Chemical structure and protein knockdown activity of ITE-ATRA. SH-SY5Y cells were treated with ITE-ATRA for 8 h. Whole-cell lysates were analyzed by western blotting.

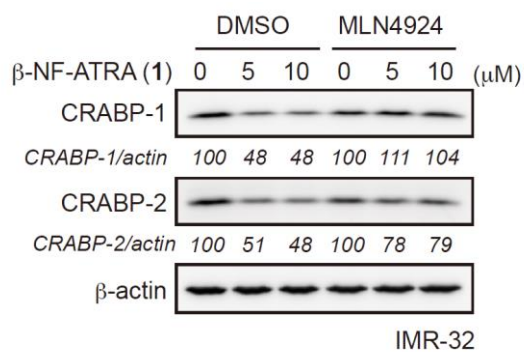

Figure S4  
Inhibitory effect of MLN4924 on IMR-32 cells. Cells were treated with β-NF-ATRA in the presence or absence of 10 μM MLN4924.

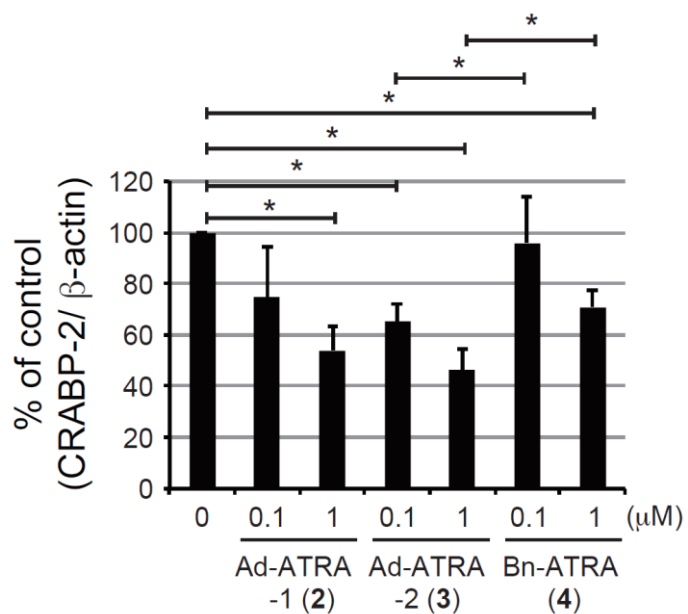

Figure S5  
Statistical analysis of protein knockdown activity of HyT 2, 3, and 4 in MCF-7 cells. Data in the bar graph are the mean ± S.D. (error bars) of three independent experiments. \* indicates P < 0.05

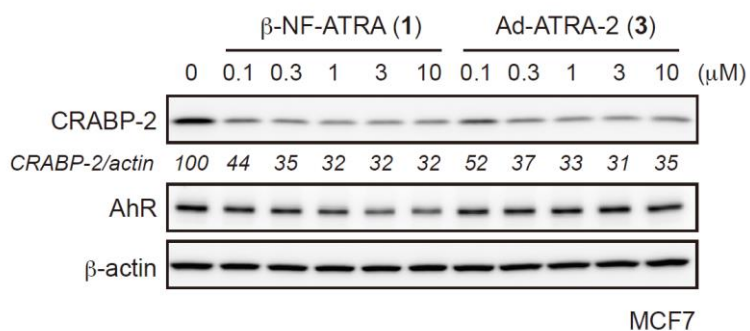

Figure S6

Protein knockdown activity of the indicated compounds. MCF-7 cells were treated with the compounds for 24 h. Whole-cell lysates were analyzed by western blotting.

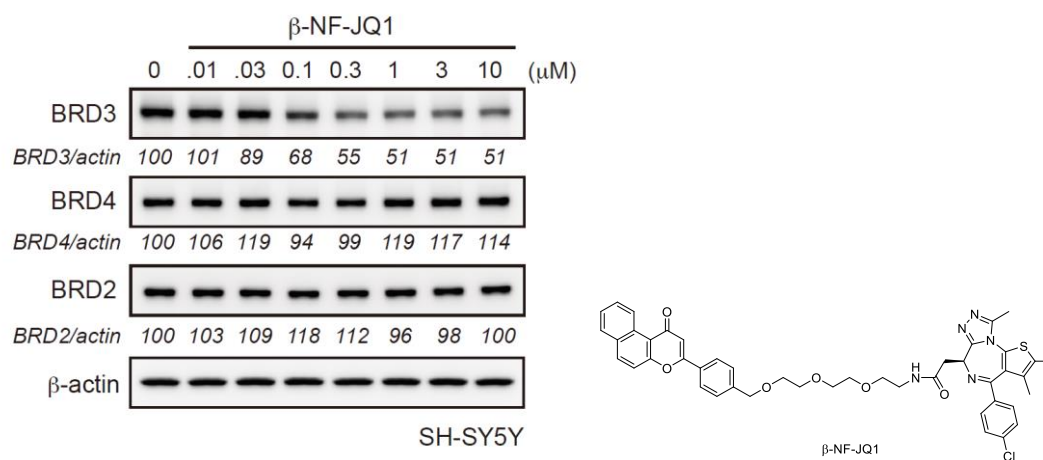

Figure S7

Chemical structure and protein knockdown activity of  $\beta$ -NF-JQ1. SH-SY5Y cells were treated with  $\beta$ -NF-JQ1 for 24 h. Whole-cell lysates were analyzed by western blotting.
